# Supplementary material for: Facile electrochemical preparation of hierarchical porous structures to enhance manganese oxide charge-storage properties in ionic liquid electrolytes
Source: Royal Society of Chemistry journal article supplement (doi:10.1039/c6ta00342g), 2016-01-01
Supplement: c6ta00342g1.pdf [file c6ta00342g1.pdf]

# Supporting Information

**Facile electrochemical preparation of hierarchical porous structures  
to enhance manganese oxide charge-storage properties  
in ionic liquid electrolyte**

Cheng-Hsien Yang, I-Wen Sun, Chien-Te Hsieh, Tzi-Yi Wu, Ching-Yuan Su, Yun-  
Shan Li, Jeng-Kuei Chang\*

Table S1. Supercapacitive properties of the proposed hierarchical porous MnO<sub>2</sub> electrode in BMP–DCA IL compared to those of other nanostructured MnO<sub>2</sub>/IL electrolyte combinations reported in the literature.

| Electrode                                                                                | Electrolyte                              | Maximum energy density (Wh/kg) | Maximum power density (kW/kg) | Ref.       |
|------------------------------------------------------------------------------------------|------------------------------------------|--------------------------------|-------------------------------|------------|
| 3D mesoporous MnO <sub>2</sub> @Si nanowires                                             | LiClO <sub>4</sub> /PMP–NTf <sub>2</sub> | 0.17 Wh/L <sup>a</sup>         | 16 W/L <sup>a</sup>           | 20         |
| MnO <sub>2</sub> @nanoporous Au                                                          | EMI–DCA                                  | 40                             | 150 <sup>b</sup>              | 21         |
| Asymmetrical nickel foam/CNT/Au/MnO <sub>2</sub> (positive)//activated carbon (negative) | BMI–PF <sub>6</sub> /DMF                 | 67.5                           | 20.4                          | 22         |
| MnO <sub>2</sub> nanowires                                                               | LiClO <sub>4</sub> /OZO quasi-IL         | 76 <sup>c</sup>                | 15.6 <sup>c</sup>             | 23         |
| Macroporous manganese oxide film                                                         | Li <sup>+</sup> /BMMI–NTf <sub>2</sub>   | 29 <sup>c</sup>                |                               | 24         |
| Reduced graphene oxide/MnO <sub>2</sub> /Ag nanowire                                     | BMI–NTf <sub>2</sub> gel                 | 2.3 Wh/L <sup>a</sup>          | 162 W/L <sup>a</sup>          | 25         |
| Hierarchical porous MnO <sub>2</sub>                                                     | BMP–DCA                                  | 90                             | 43                            | This study |

**BMI: 1-butyl-3-methylimidazolium; BMMI: 1-butyl-2,3-dimethylimidazolium; BMP: N-butyl-N-methylpyrrolidinium; DCA: dicyanamide; DMF: N,N-dimethylformamide; EMI: 1-ethyl-3-methylimidazolium; NTf<sub>2</sub>: bis(trifluoromethylsulfonyl)imide; OZO: 2-oxazolidinone; PMP: 1-methyl-1-propylpyrrolidinium.**

<sup>a</sup> calculated based on volume. <sup>b</sup> based on a different calculation method.  
<sup>c</sup> calculated from the provided data.

Table S2. The  $E_0$  values of hierarchical porous  $\text{MnO}_2$  and flat  $\text{MnO}_2$  electrodes derived from the XAS spectra shown in Figure 3.

| Potential       | $E_0$ (eV)            |                     |
|-----------------|-----------------------|---------------------|
|                 | Porous $\text{MnO}_2$ | Flat $\text{MnO}_2$ |
| -2.2 V (step 1) | 6549.2                | 6550.1              |
| +0.8 V (step 2) | 6551.6                | 6550.9              |
| -2.2 V (step 3) | 6549.2                | 6550.2              |

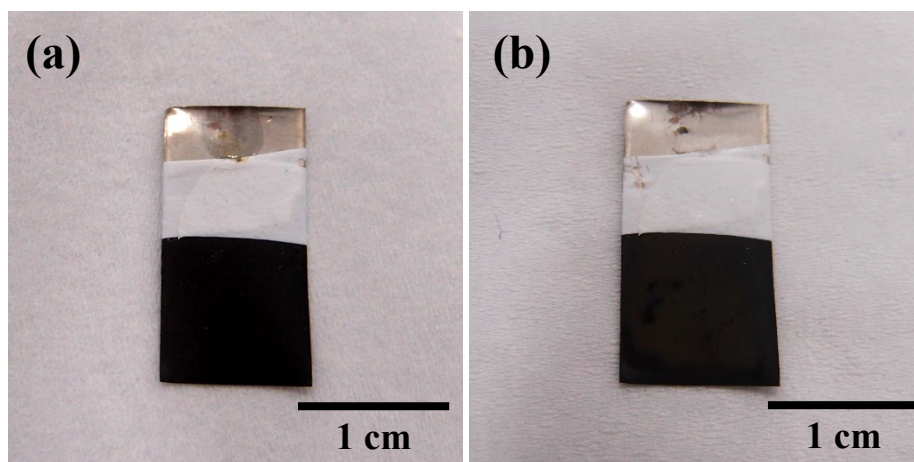

Figure S1. Photos of the porous Ni electrodes (a) without and (b) with deposited  $\text{MnO}_2$ .

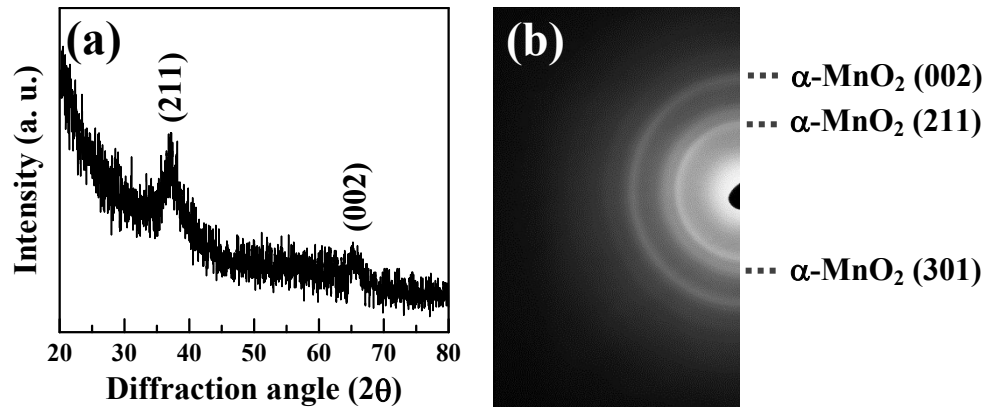

Figure S2. (a) X-ray diffraction pattern and (b) electron diffraction pattern of deposited Mn oxide.

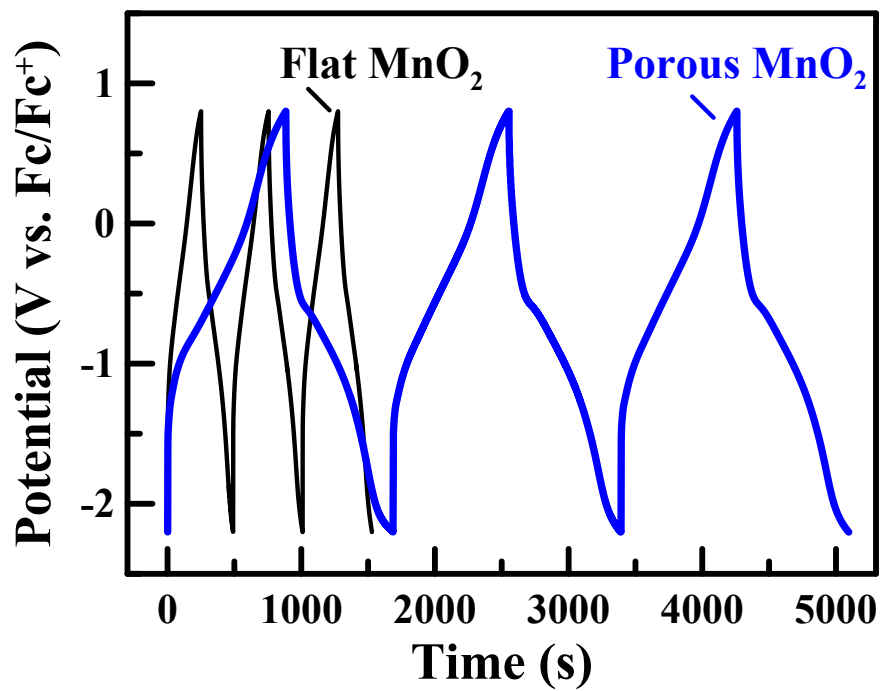

Figure S3. Chronopotentiograms of hierarchical porous MnO<sub>2</sub> electrode and flat MnO<sub>2</sub> electrode recorded in the three-electrode cell. The applied current density was  $\pm 1.0 \text{ A g}^{-1}$ .

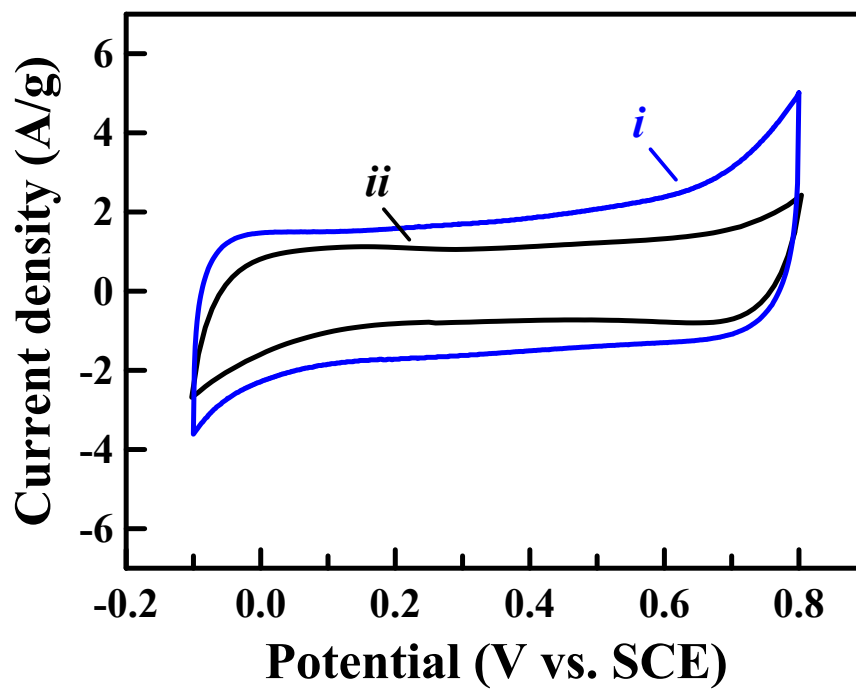

Figure S4. CV curves of hierarchical porous MnO<sub>2</sub> electrode (curve *i*) and flat MnO<sub>2</sub> electrode (curve *ii*) measured in aqueous Na<sub>2</sub>SO<sub>4</sub> electrolyte with a potential sweep rate of 5 mV s<sup>-1</sup>.

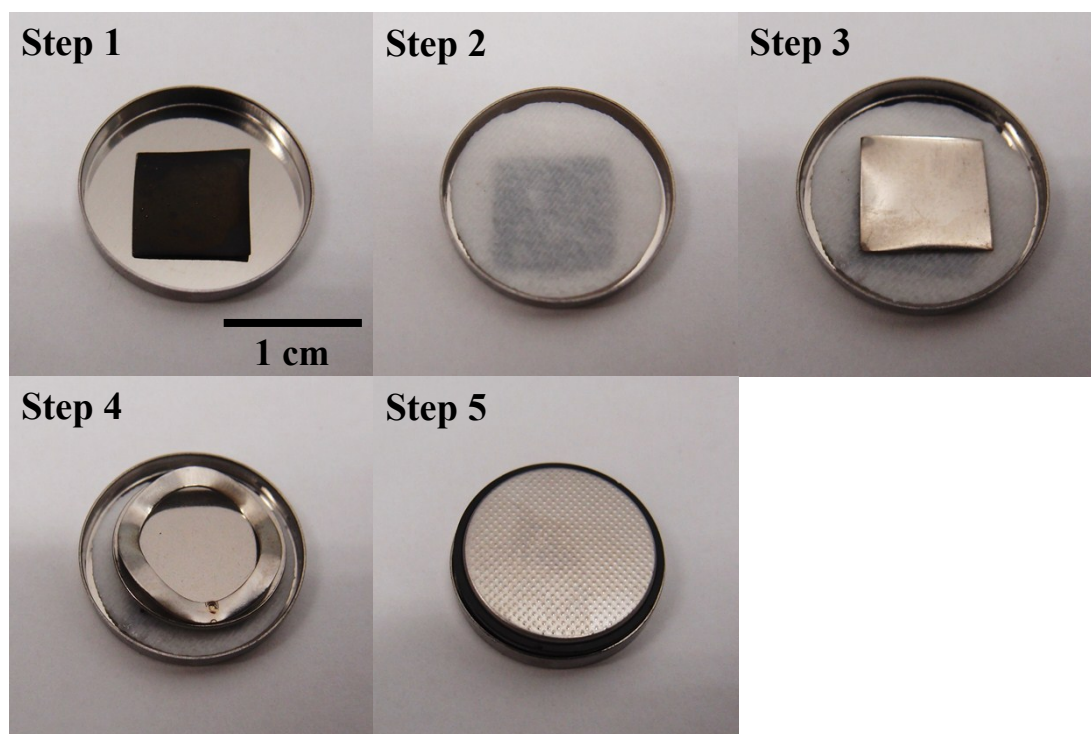

Figure S5. Photos of two-electrode symmetric cell assembly.
